# Supplementary material
Source: PubMed Central journal article supplement (PMC4020237)

## Appendix 1 Medical Outcome Study Six-Item Sleep Scale

How often during the past 4 weeks did you...

(circle one number on each line)

|                                                                                 | All of the time | Most of the time | A good bit of the time | Some of the time | A little of the time | None of the time |
|---------------------------------------------------------------------------------|-----------------|------------------|------------------------|------------------|----------------------|------------------|
| 1. Get enough sleep to feel rested upon waking in the morning? (MOS-1)          | 1               | 2                | 3                      | 4                | 5                    | 6                |
| 2. Awaken short of breath or with a headache? (MOS-2)                           | 1               | 2                | 3                      | 4                | 5                    | 6                |
| 3. Have trouble falling asleep? (MOS-3)                                         | 1               | 2                | 3                      | 4                | 5                    | 6                |
| 4. Awaken during your sleep time and have trouble falling asleep again? (MOS-4) | 1               | 2                | 3                      | 4                | 5                    | 6                |
| 5. Have trouble staying awake during the day? (MOS-5)                           | 1               | 2                | 3                      | 4                | 5                    | 6                |
| 6. Get the amount of sleep you needed? (MOS-6)                                  | 1               | 2                | 3                      | 4                | 5                    | 6                |

MOS, Medical Outcomes Study.

Appendix 2 Scatter plots between variables

Figure 1 (a) Scatter plot shows a positive linear relationship between Medical Outcomes Study (MOS)-1 and MOS-2. (b) Scatter plot shows a positive linear relationship between sleep problem index (SPI) and pain interference score.

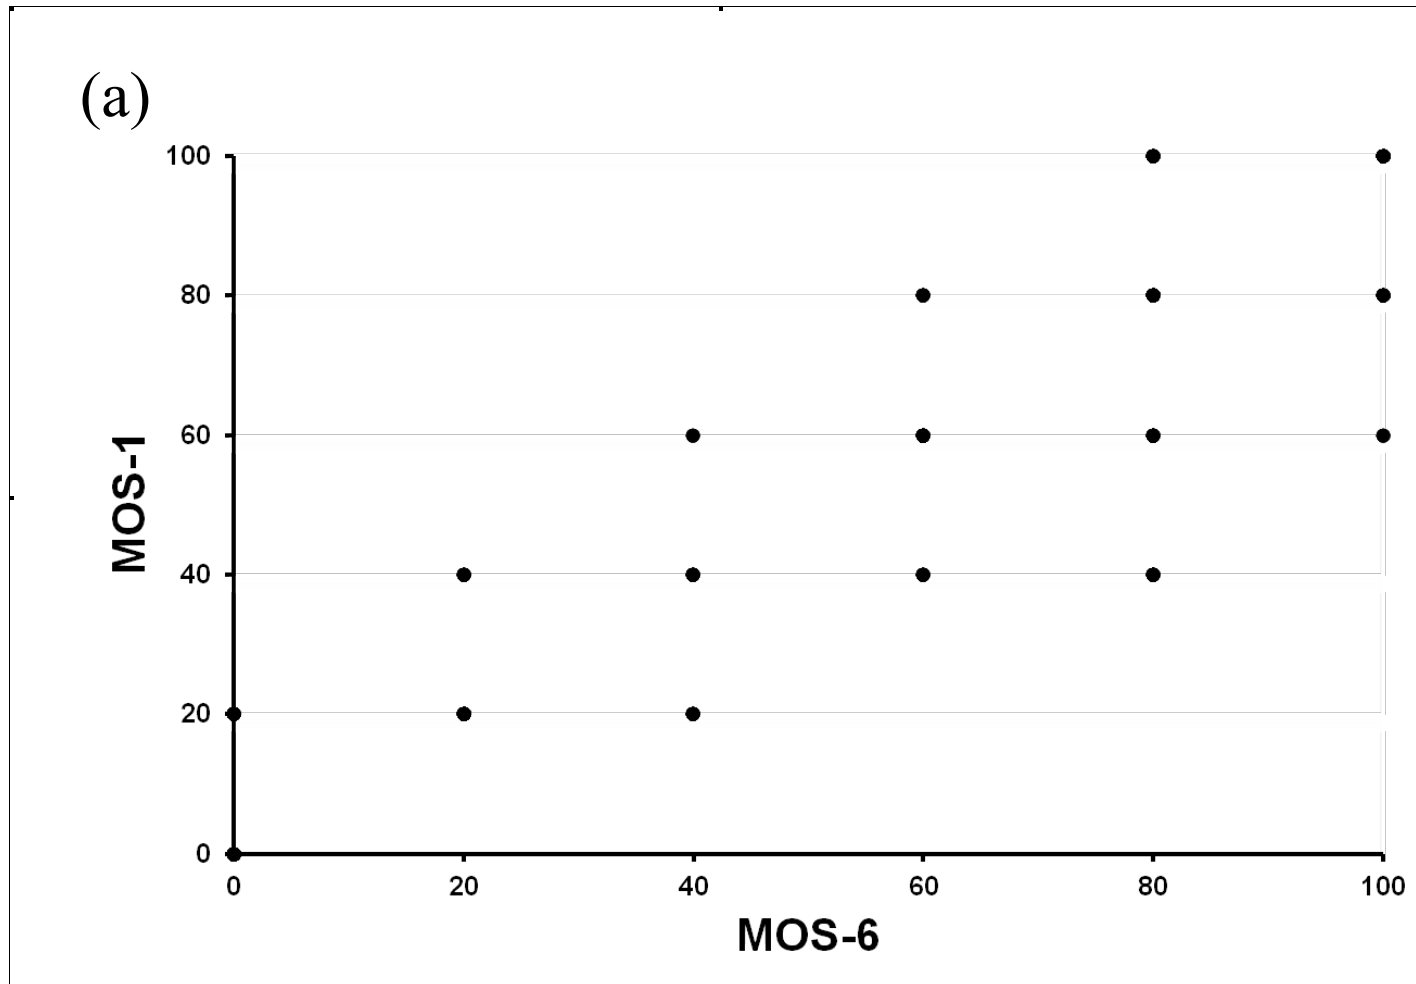

(b)

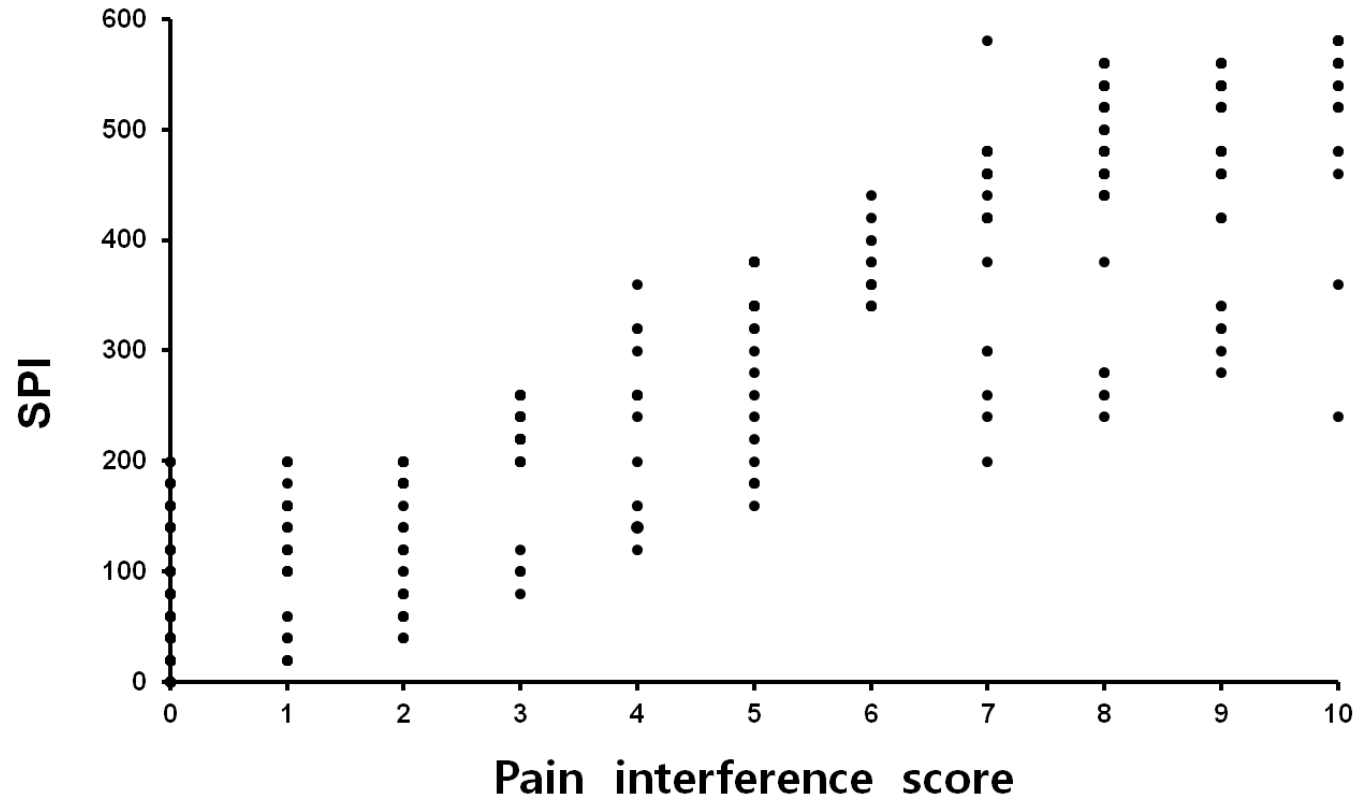

Supplement: jdi-4-405-s1.pdf [file jdi-4-405-s1.pdf]
